# Supplementary material
Source: Springer Nature journal article supplement (https://www.springermedizin.de/resource/supplementary/13601_2013_653_MOESM2_ESM.pdf/9678616)

CD3<sup>+</sup>CD4<sup>+</sup>IL-17 Tcells

3.0  
2.5  
2.0  
1.5  
1.0  
0.5  
0

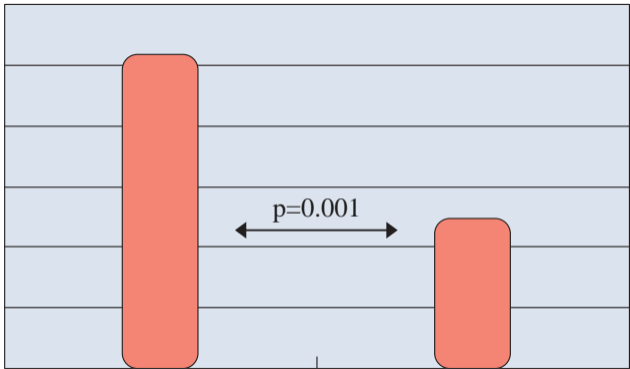

AR patients

Healthy controls

Supplement: MOESM2 [file 9678616]
